# Supplementary material for: Control of the morphology of PbI2 films for efficient perovskite solar cells by strong Lewis base additives
Source: Royal Society of Chemistry journal article supplement (doi:10.1039/c7tc01973d), 2017-01-01
Supplement: c7tc01973d1.pdf [file c7tc01973d1.pdf]

## Supporting Information

# **Control of the morphology of PbI<sub>2</sub> films for efficient perovskite solar cells by strong Lewis base additives**

Xiaobing Cao,<sup>a</sup> Lili Zhi,<sup>b</sup> Yahui Li,<sup>a</sup> Fei Fang,<sup>a,c</sup> Xian Cui,<sup>a</sup> Youwei Yao,<sup>c</sup> Lijie Ci,<sup>b</sup>

Kongxian Ding,<sup>d</sup> Jinquan Wei<sup>a\*</sup>

<sup>a</sup>State Key Lab of New Ceramic and Fine Processing, School of Materials Science and  
Engineering, Tsinghua University, Beijing 100084, P.R. China

<sup>b</sup>School of Materials Science & Engineering, Shandong University, Jinan 250061,  
Shandong, P.R. China

<sup>c</sup>Institute of Advanced Materials, Graduate School at Shenzhen, Tsinghua University,  
Shenzhen 518055, P.R. China

<sup>d</sup>Shenzhen Jiawei Solar Lighting Co., Ltd., Fuping Road New Industrial Zone No. 1-4,  
Longgang District, Shenzhen 518112, Guangdong, P.R. China

\*E-mail: [jqwei@tsinghua.edu.cn](mailto:jqwei@tsinghua.edu.cn)

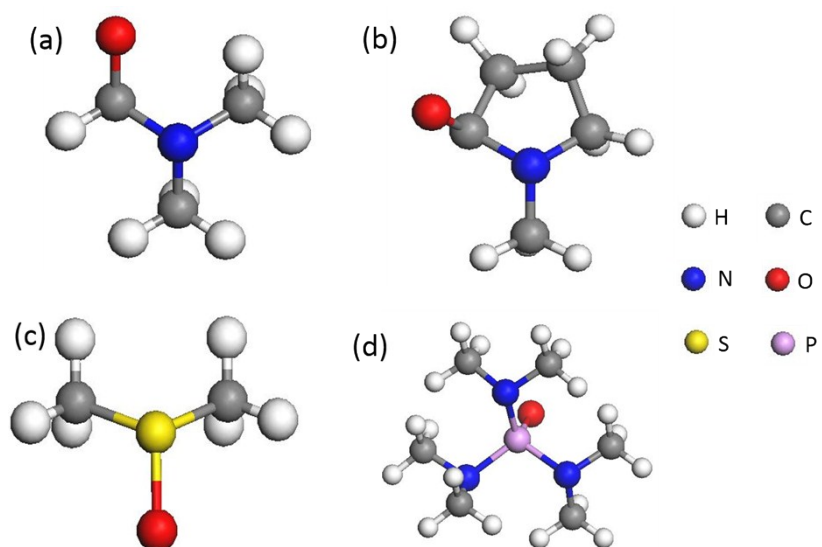

**Figure S1** Molecule structure of the solvents. (a) DMF, (b) NMP, (c) DMSO, (d) HMPA

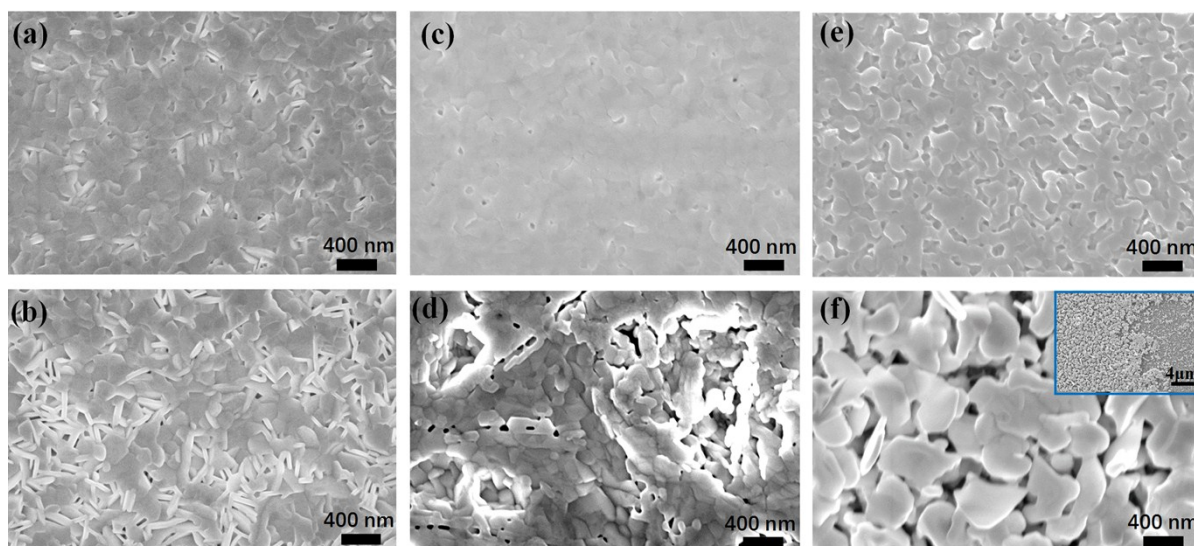

**Figure S2.** SEM images of the  $\text{PbI}_2$  films fabricated from  $\text{PbI}_2/\text{DMF}$  solution with different Lewis base additives after annealing. (a) 10% NMP, (b) 20% NMP, (c) 10% DMSO, (d) 30% DMSO, (e) 2% HMPA, (f) 10% HMPA. Too much or too little additives (NMP, DMSO, or HMPA) in the  $\text{PbI}_2/\text{DMF}$  solution will significantly reduce pore structure, or lead to too many pores and even forming discontinuous films. Inset is a low magnification SEM image of the  $\text{PbI}_2$  film fabricated from 10% HMPA, showing a discontinuous film.

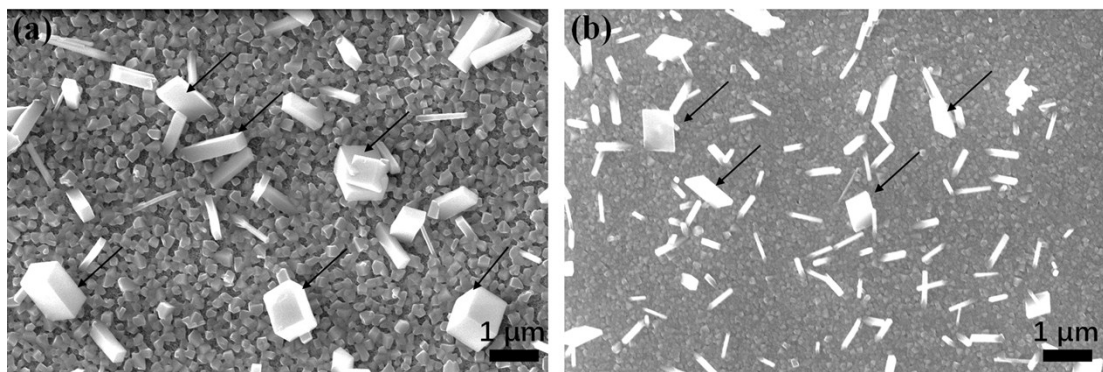

**Figure S3.** SEM images of perovskite film fabricated from different reaction times and MAI concentrations in the 2-isopropyl (IPA) solution. (a) Reaction for 20 min in 10 mg mL<sup>-1</sup> MAI/IPA solution, (b) reaction for 10 min in 12 mg mL<sup>-1</sup> MAI/IPA solution. Iodine-rich environment at the surface of perovskite film can provide driving force for the growth of cub-like MAPbI<sub>3</sub> (as shown by arrows) via dissolution and recrystallization growth process, which leads to rough surface the perovskite films.

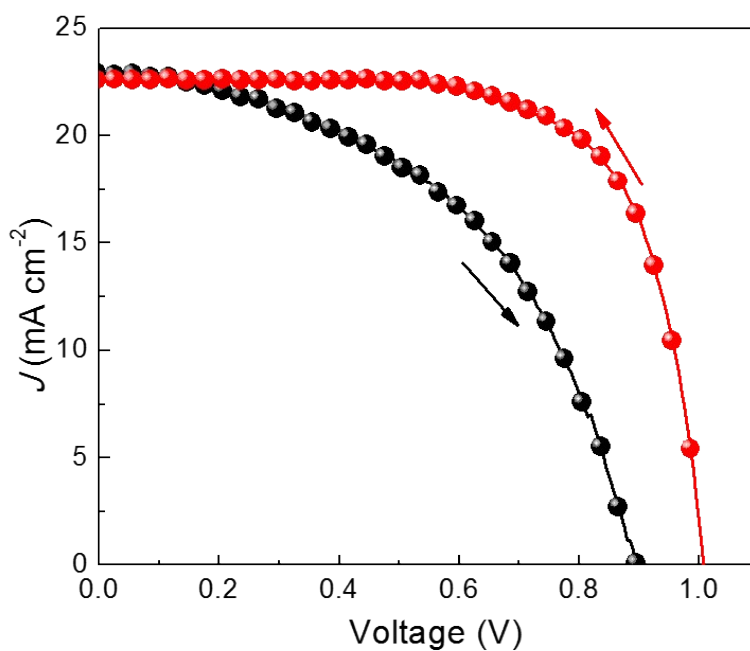

**Figure S4.** Hysteresis behaviors of a perovskite solar cell fabricated from solution with 20% DMSO additive. The perovskite solar cells exhibit typical hysteresis behaviors. There is obvious discrepancy between forward scan (dark line) and reverse scan (red line) density-voltage ( $J$ - $V$ ) curves.

**Table S1** The statistical photovoltaic parameters of PSCs fabricated from different Lewis basicity solutions

| Samples  | $J_{sc}$<br>(mA cm <sup>-2</sup> ) | $V_{oc}$<br>(V) | $FF$      | PCE<br>(%) |
|----------|------------------------------------|-----------------|-----------|------------|
| Pure DMF | 19.48±1.34                         | 0.97±0.02       | 0.57±0.04 | 10.47±1.13 |
| 30% NMP  | 20.36±1.10                         | 0.98±0.01       | 0.65±0.03 | 13.10±0.82 |
| 20% DMSO | 22.24±0.65                         | 0.99±0.01       | 0.66±0.02 | 14.68±0.82 |
| 5% HMPA  | 18.32±1.23                         | 0.92±0.03       | 0.59±0.05 | 10.11±1.21 |
